# Supplementary material
Source: PubMed Central journal article supplement (PMC10124900)
Supplement: mmc1.pdf [file mmc1.pdf]

## Supporting information

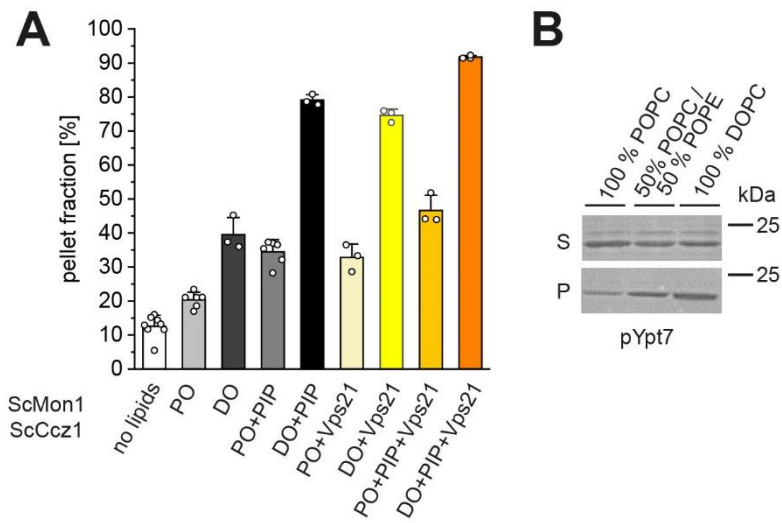

**Figure S1:** (A) Quantification of binding of ScMC1 to liposomes without and with Vps21, high packing defects (DO), charged lipids (PIP), and different combinations (n=3-8). The graph summarizes data presented in Figures 2. (B) Liposome sedimentation assays with prenylated Ypt7 bound to REP (Rab escort protein) after incubation with GTP in the presence of liposomes of varying composition for 30 min.

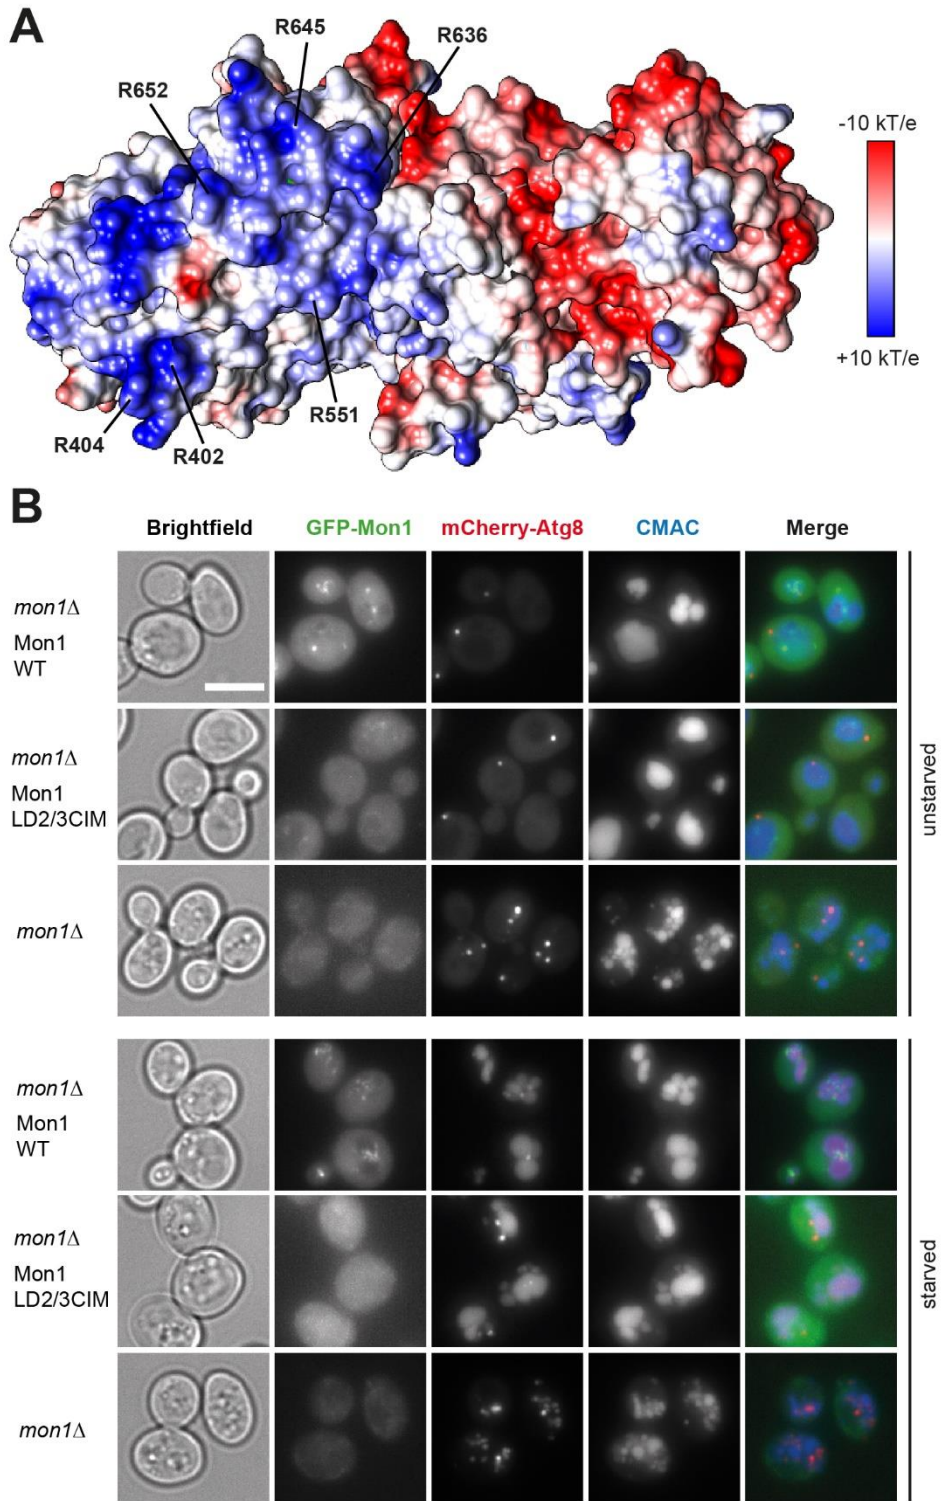

**Figure S2:** Role of a charged patch on Mon1 in MC1 complex function. **(A)** Surface potential representation of the putative membrane binding interface of the CtMC1 complex. The locations of key basic residues of Mon1 involved in PIP binding are indicated. **(B)** Fluorescence microscopy images of *mon1* $\Delta$  yeast expressing mCherry-Atg8 and complemented with GFP-ScMon1<sup>WT</sup> or different GFP-ScMon1<sup>CIM</sup> variants. Vacuoles are stained with CMAC.

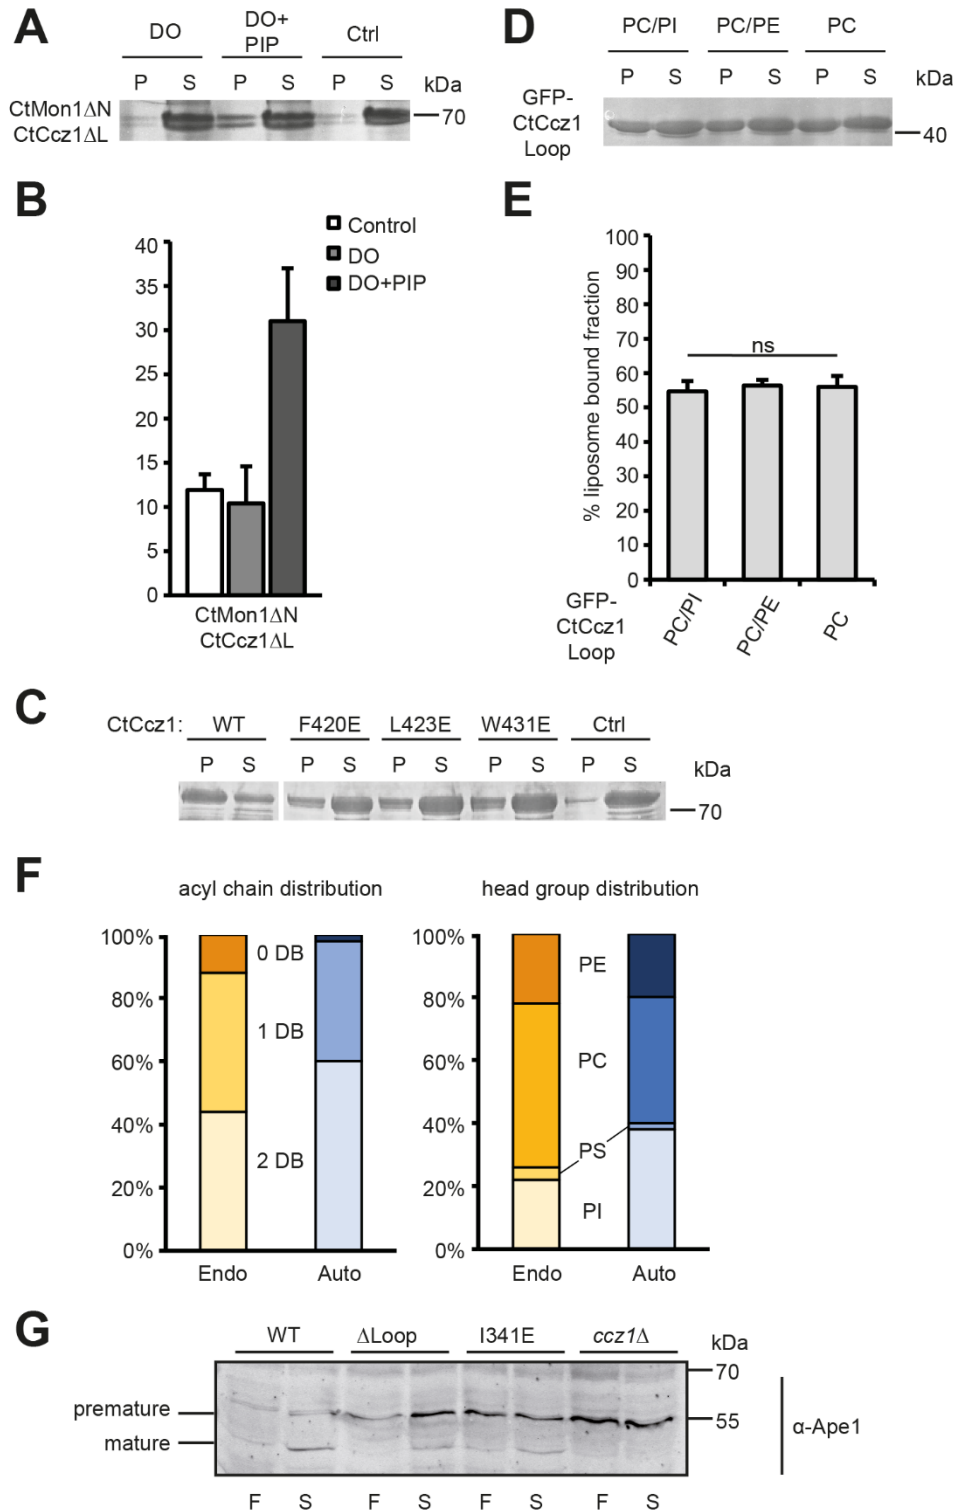

**Figure S3:** Characterization of the Ccz1 amphipathic helix. **(A)** Sedimentation assays of CtMC1 $\Delta$  (CtMon1 141-665/CtCcz1 1-360,461-796) with liposomes form DO (di-oleoyl) lipid mix with or without PIP **(B)** Quantification of A (n=4). **(C)** Reduced binding of CtCcz1 point mutants in the amphipathic helix to DO liposomes. **(D)** Binding of GFP-CtCcz1<sup>Loop</sup> to di-oleoyl phosphatidylcholine (PC) with or without 20% di-oleoyl phosphatidylinositol (PI) or di-oleoyl phosphatidylethanolamine (PE). **(E)** Quantification of D (n=3). Quantification data are

presented as mean  $\pm$ SD. **(F)** Phospholipid composition of yeast endosomes (endo) and autophagosomes (auto). DB: double bond; PI: phosphatidylinositol; PS: phosphatidylserine; PC: phosphatidylcholine; PE: phosphatidylethanolamine. **(G)** Ape1 processing assay of fed (F) and starved (S) *ccz1* $\Delta$  yeast complemented with GFP-ScCcz1<sup>WT</sup> or different GFP-ScCcz1 variants.

**Table S1:** Composition of lipid mixes used in this study

| <b>Lipid mix</b> | <b>Composition</b>                                                                                                                                                                                                                                                                                                                           |
|------------------|----------------------------------------------------------------------------------------------------------------------------------------------------------------------------------------------------------------------------------------------------------------------------------------------------------------------------------------------|
| PO               | 82 mol% 1-palmitoyl-2-oleoyl phosphatidylcholine<br>18 mol% 1-palmitoyl-2-oleoyl phosphatidylethanolamine                                                                                                                                                                                                                                    |
| PO+PIP           | 79 mol% 1-palmitoyl-2-oleoyl phosphatidylcholine<br>18 mol% 1-palmitoyl-2-oleoyl phosphatidylethanolamine<br>2 mol% dipalmitoylphosphatidylinositol-3-phosphate<br>1 mol% dipalmitoylphosphatidylinositol-3,5-bisphosphate                                                                                                                   |
| DO               | 82 mol% dioleoyl phosphatidylcholine<br>18 mol% dioleoyl phosphatidylethanolamine                                                                                                                                                                                                                                                            |
| DO+PIP           | 79 mol% dioleoyl phosphatidylcholine<br>18 mol% dioleoyl phosphatidylethanolamine<br>2 mol% dipalmitoylphosphatidylinositol-3-phosphate<br>1 mol% dipalmitoylphosphatidylinositol-3,5-bisphosphate                                                                                                                                           |
| PC               | 100 mol% 1-palmitoyl-2-oleoyl phosphatidylcholine                                                                                                                                                                                                                                                                                            |
| PC/PI            | 80 mol% 1-palmitoyl-2-oleoyl phosphatidylcholine<br>20 mol% 1-palmitoyl-2-oleoyl phosphatidylinositol                                                                                                                                                                                                                                        |
| PC/PE            | 80 mol% 1-palmitoyl-2-oleoyl phosphatidylcholine<br>20 mol% 1-palmitoyl-2-oleoyl phosphatidylethanolamine                                                                                                                                                                                                                                    |
| Endo             | 40 mol% dioleoyl phosphatidylcholine<br>12 mol% dipalmitoyl phosphatidylcholine<br>22 mol% 1-palmitoyl-2-oleoyl phosphatidylethanolamine<br>22 mol% 1-palmitoyl-2-oleoyl phosphatidylinositol<br>4 mol% dioleoyl phosphatidylserine                                                                                                          |
| Auto             | 38 mol% dioleoyl phosphatidylcholine<br>2 mol% dipalmitoyl phosphatidylcholine<br>20 mol% dioleoyl phosphatidylethanolamine<br>38 mol% 1-palmitoyl-2-oleoyl phosphatidylinositol<br>2 mol% dioleoyl phosphatidylserine                                                                                                                       |
| Endo+PIP         | 40 mol% dioleoyl phosphatidylcholine<br>2 mol% 1-palmitoyl-2-oleoyl phosphatidylcholine<br>10 mol% dipalmitoyl phosphatidylcholine<br>22 mol% 1-palmitoyl-2-oleoyl phosphatidylethanolamine<br>20 mol% 1-palmitoyl-2-oleoyl phosphatidylinositol<br>4 mol% dioleoyl phosphatidylserine<br>2 mol% dipalmitoylphosphatidylinositol-3-phosphate |
| Auto+PIP         | 38 mol% dioleoyl phosphatidylcholine<br>2 mol% 1-palmitoyl-2-oleoyl phosphatidylcholine<br>20 mol% dioleoyl phosphatidylethanolamine<br>36 mol% 1-palmitoyl-2-oleoyl phosphatidylinositol<br>2 mol% dioleoyl phosphatidylserine<br>2 mol% dipalmitoylphosphatidylinositol-3-phosphate                                                        |

**Table S2:** Plasmids used in this study

| <b>Plasmid</b> | <b>Construct</b>                                                                                      |
|----------------|-------------------------------------------------------------------------------------------------------|
| DK65           | pCDF6P-CtMon1 <sup>FL</sup><br>(GST-PreScission site CtMon1 1-665)                                    |
| DK44           | pCDF6P-CtMon1 <sup>ΔN</sup><br>(GST-PreScission site CtMon1 141-665)                                  |
| DK123          | pCDF6P-CtMon1 <sup>LD1</sup><br>(GST-PreScission site CtMon1 141-355)                                 |
| DK1534         | pCDF6P-CtMon1 <sup>LD2CIM</sup><br>(GST-PreScission site CtMon1 141-665; R402E, R404E, R551E)         |
| DK1535         | pCDF6P-CtMon1 <sup>LD3CIM</sup><br>(GST-PreScission site CtMon1 141-665; R636E, R645E, R652E)         |
| CU3481         | pRS406-GFP-ScMon1 <sup>WT</sup><br>(NOP1pr GFP-ScMon1 1-644)                                          |
| DK1585         | pRS406-GFP-ScMon1 <sup>LD2CIM</sup><br>(NOP1pr GFP-ScMon1 1-644; R374E, R376E)                        |
| DK1514         | pRS406-GFP-ScMon1 <sup>LD3CIM</sup><br>(NOP1pr GFP-ScMon1 1-644; K620E, K624E, K631E)                 |
| DK1585         | pRS406-GFP-ScMon1 <sup>LD2/3CIM</sup><br>(NOP1pr GFP-ScMon1 1-644; R374E, R376E, K620E, R624E, K631E) |
| DK46           | pET28HS-CtCcz1 <sup>FL</sup><br>(6xHis-SUMO CtCcz1 1-796)                                             |
| DK48           | pET28HS-CtCcz1 <sup>LD1</sup><br>(6xHis-SUMO CtCcz1 1-249)                                            |
| DK857          | pET28HS CtCcz1 <sup>ΔLoop</sup><br>(6xHis-SUMO CtCcz1 1-360,461-796)                                  |
| DK1052         | pET28HS CtCcz1 <sup>ΔAH</sup><br>(6xHis-SUMO CtCcz1 1-407,441-796)                                    |
| DK1149         | pET28HS CtCcz1 <sup>L423E</sup><br>(6xHis-SUMO CtCcz1 1-796; L423E)                                   |
| DK134          | pET28GFP<br>(6xHis-Thrombin site-GFP)                                                                 |
| DK1287         | pET28GFP-CtCcz1 <sup>Loop</sup><br>(6xHis-Thrombin site-GFP CtCcz1 360-460)                           |
| DK1677         | pET28GFP-CtCcz1 <sup>LoopΔAH</sup><br>(6xHis-Thrombin site-GFP CtCcz1 360-407,441-460)                |
| CU5525         | pRS406-ScCcz1 <sup>WT</sup> -mNEON<br>(CCZ1pr-ScCcz1 1-704 mNEON)                                     |
| CU5528         | pRS406-ScCcz1 <sup>ΔLoop</sup> -mNEON<br>(CCZ1pr-ScCcz1 1-269,404-704 mNEON)                          |
| CU5527         | pRS406-ScCcz1 <sup>I341E</sup> -mNEON<br>(CCZ1pr-ScCcz1 1-704; I341E mNEON)                           |
| CU2452         | pET24d-GST-TEV-Vps21                                                                                  |
| CU4527         | pET24d GST-TEV-Ypt10                                                                                  |
| CU5326         | pET-DUET-1-HIS-TEV-Atg8 (Gift from Sascha Martens)                                                    |

**Table S3:** Recombinant proteins construct names and molecular weights.

| <b>Short name</b>           | <b>Construct</b>                       | <b>Molecular weight (kDa)</b> |
|-----------------------------|----------------------------------------|-------------------------------|
| CtMon1                      | GST-CtMon1 1-665                       | 98.6                          |
| CtCcz1                      | HisSumo-CtCcz1 1-796                   | 99.5                          |
| CtMon1-LD1                  | CtMon1 141-355                         | 23.0                          |
|                             | GST- CtMon1 141-355                    | 49.9                          |
| CtCcz1-LD1                  | CtCcz1 1-249                           | 33.2                          |
| CtMon1 $\Delta$ N           | CtMon1 141-665                         | 57.5                          |
|                             | GST-CtMon1 141-665                     | 74.4                          |
| CtMon1 $\Delta$ N LD2CIM    | GST-CtMon1 141-665 R402E, R404E, R551E | 74.4                          |
| CtMon1 $\Delta$ N LD3CIM    | GST-CtMon1 141-665 R363E, R645E, R652E | 74.4                          |
| Ccz1 $\Delta$ loop          | HisSumo-CtCcz1 1-796 $\Delta$ 361-460  | 89.3                          |
| Ccz1 $\Delta$ AH            | HisSumo-CtCcz1 1-796 $\Delta$ 408-440  | 96.0                          |
| CtCcz1 L423E                | HisSumo-CtCcz1 1-796 L423E             | 99.5                          |
| GFP                         | eGFP                                   | 27.9                          |
| GFP-CtCcz1 Loop             | eGFP-CtCcz1 360-460                    | 38.7                          |
| GFP-CtCcz1 Loop $\Delta$ AH | eGFP-CtCcz1 360-460 $\Delta$ 408-440   | 35.2                          |
| ScMon1                      | ScMon1 1-644                           | 73.5                          |
| ScCcz1                      | CaM-ScCcz1 1-704                       | 97.7                          |
| Vps21                       | ScVps21 1-210                          | 23.0                          |
| Ypt10                       | ScYpt10 1-199                          | 21.8                          |
| Atg8                        | ScAtg8 1-117                           | 13.6                          |
